# Supplementary material for: Inkjet-printed 3D micro-ring-electrode arrays for amperometric nanoparticle detection
Source: Royal Society of Chemistry journal article supplement (doi:10.1039/d2nr05640b), 2023-01-01
Supplement: d2nr05640b1.pdf [file d2nr05640b1.pdf]

## Supporting information

# Inkjet-printed 3D micro-ring-electrode arrays for amperometric nanoparticle detection

Hu Peng<sup>a,&</sup>, Leroy Grob<sup>a,&</sup>, Lennart Jakob Konstantin Weiß<sup>a,&</sup>, Lukas Hiendlmeier<sup>a</sup>, Emir Music<sup>a</sup>, Inola Kopic<sup>a</sup>, Tetsuhiko Teshima<sup>a,b</sup>, Philipp Rinklin<sup>a</sup>, and Bernhard Wolfrum<sup>a,\*</sup>

*a* Neuroelectronics, Munich Institute of Biomedical Engineering, Department of Electrical Engineering, TUM School of Computation, Information and Technology, Technical University of Munich, Hans-Piloly-Str. 1, 85748, Garching, Germany

*b* Medical & Health Informatics Laboratories NTT Research Incorporated 940 Stewart Dr, Sunnyvale, CA 94085, USA

& These authors contributed equal: Hu Peng, Leroy Grob, Lennart Jakob Konstantin Weiß

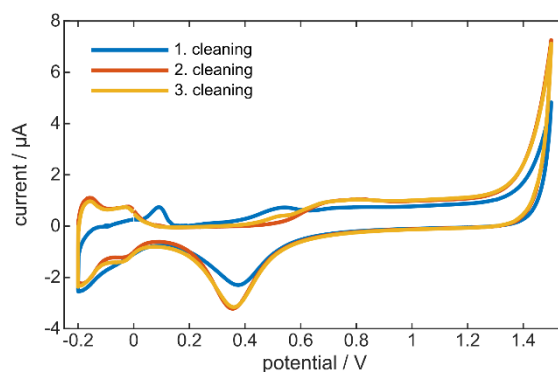

**Fig. 1** H<sub>2</sub>SO<sub>4</sub> activation/cleaning cycles to clean the electrodes, which was carried out in between the detection experiments. The data corresponds to the 10<sup>th</sup> cycle of the CV in 200 mM H<sub>2</sub>SO<sub>4</sub> (500 mV s<sup>-1</sup> scan rate, potential -0.2 V to 1.5 V vs Ag/AgCl), where all electrodes on the chip were short-circuited.
